# Supplementary material
Source: publisher figshare collection journal article supplement (https://sage.figshare.com/ndownloader/files/15482918)
Supplement: Supplementary file 1 [file 15482918]

## Supplementary materials

**Table S1 Time to disability worsening confirmed for 12 weeks at all time points up to Year 7 in BVL groups<sup>a</sup> (Baseline to Year 2)**

| <b>Year</b> | <b>Group 1 vs Group 3</b>              | <b>Group 2 vs Group 3</b>              |
|-------------|----------------------------------------|----------------------------------------|
|             | Hazard ratio (95% CI); <i>p</i> -value | Hazard ratio (95% CI); <i>p</i> -value |
| <b>3</b>    | 0.57 (0.39, 0.83); <i>p</i> =0.0033    | 0.64 (0.46, 0.90); <i>p</i> =0.0091    |
| <b>4</b>    | 0.54 (0.38, 0.77); <i>p</i> =0.0006    | 0.63 (0.46, 0.85); <i>p</i> =0.0030    |
| <b>5</b>    | 0.55 (0.39, 0.77); <i>p</i> =0.0006    | 0.66 (0.49, 0.90); <i>p</i> =0.0079    |
| <b>6</b>    | 0.59 (0.42, 0.82); <i>p</i> =0.0017    | 0.68 (0.51, 0.92); <i>p</i> =0.0117    |
| <b>7</b>    | 0.58 (0.42, 0.81); <i>p</i> =0.0012    | 0.68 (0.51, 0.91); <i>p</i> =0.0085    |

<sup>a</sup>Analyses based on pooled data from placebo and active treatment groups (total population); Group 1 (least BVL): ≤0.52% reduction; Group 2 (intermediate BVL): >0.52 to 2.18% reduction; Group 3 (most BVL): >2.18% reduction.

BVL, brain volume loss; CI, confidence Interval.

**Table S2 Time to disability worsening confirmed for 24 weeks at all time points (years 3–7) in BVL groups<sup>a</sup> (Baseline to Year 2)**

| <b>Year</b> | <b>Group 1 vs Group 3</b>              | <b>Group 2 vs Group 3</b>              |
|-------------|----------------------------------------|----------------------------------------|
|             | Hazard ratio (95% CI); <i>p</i> -value | Hazard ratio (95% CI); <i>p</i> -value |
| <b>3</b>    | 0.52 (0.34, 0.80); <i>p</i> =0.0027    | 0.68 (0.47, 0.98); <i>p</i> =0.0400    |
| <b>4</b>    | 0.53 (0.36, 0.78); <i>p</i> =0.0014    | 0.67 (0.48, 0.94); <i>p</i> =0.0215    |
| <b>5</b>    | 0.53 (0.36, 0.77); <i>p</i> =0.0009    | 0.72 (0.51, 0.99); <i>p</i> =0.0449    |
| <b>6</b>    | 0.57 (0.39, 0.82); <i>p</i> =0.0024    | 0.73 (0.53, 1.01); <i>p</i> =0.0534    |
| <b>7</b>    | 0.57 (0.40, 0.81); <i>p</i> =0.0019    | 0.71 (0.52, 0.97); <i>p</i> =0.0318    |

<sup>a</sup>Analyses based on pooled data from placebo and active treatment groups (total population); Group 1 (least BVL): ≤0.52% reduction; Group 2 (intermediate BVL): >0.52 to 2.18% reduction; Group 3 (most BVL): >2.18% reduction.

BVL, brain volume loss; CI, confidence Interval.

**Table S3 Combined surrogate analysis**

| <b>Potential surrogates</b>                                                       | <b>PTE mediated through the potential surrogates</b> |
|-----------------------------------------------------------------------------------|------------------------------------------------------|
| BVL at Year 2 + Relapses over 2 years                                             | 82.1%                                                |
| BVL at Year 2 + New or enlarging T2w lesions over 2 years                         | 61.5%                                                |
| Relapses over 2 years+ New or enlarging T2w lesions over 2 years                  | 48.7%                                                |
| BVL at Year 2 + Relapses over 2 years + New or enlarging T2w lesions over 2 years | 76.9%                                                |

BVL, brain volume loss; PTE, proportion of treatment effect; T<sub>2w</sub>, T<sub>2</sub>-weighted.
